# Supplementary material
Source: publisher figshare collection journal article supplement (https://karger.figshare.com/articles/dataset/_/14054063)

# Nuôi dưỡng Thai nhi

Trong tử cung, thai nhi nhận được mọi thứ cần thiết từ cơ thể người mẹ. Điều gì sẽ xảy ra khi chế độ ăn uống của người mẹ chưa phù hợp?

## Thừa cân và thiếu cân

Trên thế giới, có **9,7%** phụ nữ bị thiếu cân và **14,9%** bị béo phì.

### Béo phì khi mang thai gây ra:

- ! Gia tăng nguy cơ mắc bệnh khi mang thai
- ! Sinh non
- ! Tử vong ở trẻ sơ sinh hoặc thai nhi
- ! Gia tăng nguy cơ mắc đái tháo đường thai kỳ (GDM)

### Thiếu cân khi mang thai gây ra:

- ! Sinh non
- ! Sinh con nhẹ cân (LBW)
- ! Trẻ tử vong trước 5 tuổi
- ! Phát triển trí tuệ và thể chất kém

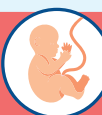

Cân nặng trước khi thụ thai <43kg hoặc cân nặng khi mang thai tăng <8kg

= 3 x nguy cơ thai nhỏ so với tuổi thai (SGA) hoặc Sinh con nhẹ cân (LBW)

Dinh dưỡng trong thời kỳ mang thai chiếm vai trò quan trọng, nhưng chưa phải là tất cả - thai nhi có thể bị ảnh hưởng nếu người mẹ không có chế độ dinh dưỡng phù hợp trong thời kỳ thiếu nữ và trước khi thụ thai.

Thiếu vi chất dinh dưỡng và thiếu máu là vấn đề thường gặp ở phụ nữ trong độ tuổi sinh sản.

Ở phụ nữ thiếu cân, bổ sung nhiều vi chất dinh dưỡng giúp giảm nguy cơ:

Sinh con nhẹ cân ▼12-14%

Sinh non ▼4-8%

Thai nhỏ so với tuổi thai ▼3-8%

Trên thế giới, thiếu máu xảy ra ở **29%** phụ nữ không mang thai và **38%** phụ nữ mang thai.

Mỗi năm có 15 triệu trẻ sinh non (<37 tuần) chào đời

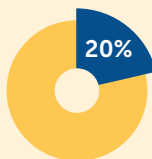

Thai rất non tháng - EPTB (<34 tuần)

Trẻ sinh non dưới 34 tuần tuổi thai tăng nguy cơ gặp phải các vấn đề sức khỏe ngắn hạn/dài hạn, bao gồm:

- ! Phổi
- ! Ruột
- ! Hệ miễn dịch
- ! Thị lực
- ! Thính giác
- ! Những vấn đề về phát triển

## Sinh non

Nguyên nhân đứng thứ 2 gây tử vong cho trẻ em dưới 5 tuổi

### Mất cân bằng axit béo omega-3 và omega-6:

chấn muối cổ tử cung sớm

co thắt tử cung

sinh non

### LCPUFA Omega-3

Khuyến cáo của WHO - trong thai kỳ:

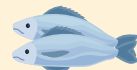

300mg/ngày

Lượng tiêu thụ (trong độ tuổi sinh đẻ): <100mg/ngày

Cải thiện nồng độ omega-3 thấp ở khi mang thai thông qua thực phẩm bổ sung có thể làm giảm nguy cơ EPTB.\*\*

Bổ sung Omega-3 LCPUFA trong thai kỳ giúp giảm nguy cơ sinh non:

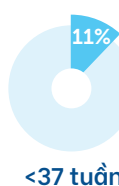

<37 tuần

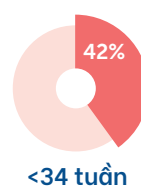

<34 tuần

## Đái tháo đường thai kỳ

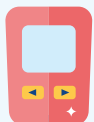

GDM (Đái tháo đường thai kỳ) xảy ra khi quá trình chuyển hóa ở thai phụ không thể duy trì mức đường huyết chuẩn, là mức giúp điều hòa quá trình vận chuyển glucose và chất dinh dưỡng vào thai nhi

### GDM không được điều trị làm tăng nguy cơ:

| Ngắn hạn                    | Dài hạn                                                      |
|-----------------------------|--------------------------------------------------------------|
| Thai nhi phát triển quá lớn | Các bệnh không lây nhiễm ở cả mẹ và con                      |
| Khó sinh do kẹt vai         | Béo phì thời thơ ấu                                          |
| Sinh mổ                     | Bất thường tim mạch                                          |
| Tăng huyết áp               | Rối loạn glucose/insulin                                     |
|                             | Sức khỏe hô hấp/dị ứng và các vấn đề về phát triển thần kinh |

**1 trên 6** phụ nữ mang thai trên toàn thế giới mắc GDM

GDM có thể dẫn đến những thay đổi ngoại di truyền không thể đảo ngược ở thai nhi

Các chiến lược dinh dưỡng có thể giúp giảm tần suất mắc GDM ở những phụ nữ có nguy cơ

### Probiotics

*L. rhamnosus* và *B. lactis Bb12*: ▼63% so với giả dược

### Myoinositol

▼50-60% ở phụ nữ có nguy cơ cao

\* Thai nhỏ so với tuổi thai

\*\* Thai rất non tháng

Annals of Nutrition and Metabolism Vol. 76/S3/20

Annales Nestlé Vol. 78/1/20-21

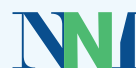

Nestlé Nutrition Institute

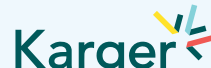

Supplement: Supplementary file 2 [file 1]
