# Supplementary material
Source: publisher figshare collection journal article supplement (https://karger.figshare.com/articles/dataset/_/14054063)

# Výživa plodu

Plod dostává v děloze prostřednictvím matčina těla vše potřebné. Ale co když se matka stravuje špatně?

## Nadváha a podváha

Na celém světě trpí **9,7 %** žen podváhou a **14,9 %** je obézních

### Obezita v těhotenství má vliv na:

- ! Zvýšenou nemocnost v těhotenství
- ! Předčasný porod
- ! Úmrtnost novorozenců
- ! Zvýšené riziko GDM (gestační diabetes mellitus)

### Podváha v těhotenství má vliv na:

- ! Předčasný porod
- ! Nízkou porodní hmotnost dítěte (NPH)
- ! Dětskou úmrtnost do 5 let
- ! Špatný mentální a fyzický vývoj

**Potravinové doplňky obsahující směs mikroživin snížily u žen s podváhou riziko:**

|                    |          |
|--------------------|----------|
| NPH                | ▼12–14 % |
| Předčasného porodu | ▼4–8 %   |
| SGA*               | ▼3–8 %   |

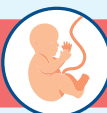

Hmotnost před početím <43 kg nebo přírůstek hmotnosti v těhotenství <8 kg = **3x vyšší riziko SGA\* nebo NPH kojení**

Důležitá není jen výživa během těhotenství – plod může být ovlivněn, pokud žena nemá správné živiny v dívčím věku a před početím.

Nedostatek mikroživin a anémie jsou u žen v reprodukčním věku běžné.

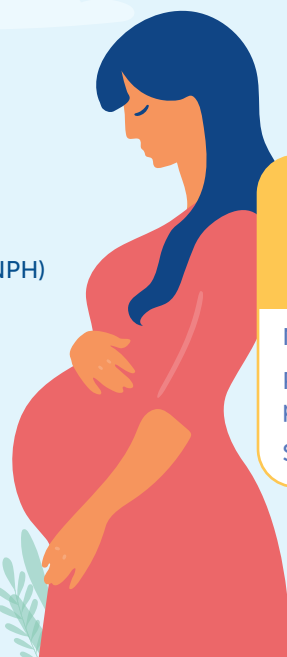

Celosvětově je chudokrevných **29 %** netěhotných žen a **38 %** těhotných žen.

Každý rok se 15 milionů dětí předčasně narodí (před 37. týdnem)

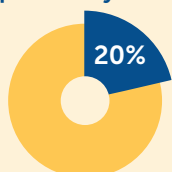

Předčasný porod před 34. týdnem

Děti narozené před 34. týdnem těhotenství mají zvýšené riziko krátkodobých/dlouhodobých zdravotních problémů, včetně:

- ! Plicních chorob
- ! Očních vad
- ! Chorob trávicí soustavy
- ! Sluchových vad
- ! Poruch imunitního systému
- ! Vývojových vad

## Předčasný porod

2. hlavní příčina úmrtí dětí do 5 let

Nerovnováha omega-3 a omega-6 mastných kyselin:

Předčasné zranění děložního hrdla

Kontrakce dělohy

Předčasný porod

**Omega-3 LCPUFA (polynenasycené mastné kyseliny s dlouhým řetězcem)**

Doporučení WHO – těhotenství:

300 mg/den

Medián příjmu (plodný věk):

<100 mg/den

Riziko předčasného porodu lze v těhotenství snížit úpravou nízkých hladin omega-3 prostřednictvím potravinových doplňků.

**Suplementace Omega-3 LCPUFA během těhotenství snižuje riziko předčasného porodu:**

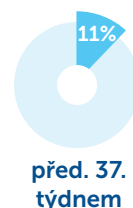

před 37. týdnem

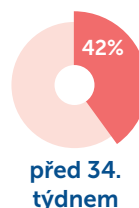

před 34. týdnem

## Gestační diabetes mellitus (těhotenská cukrovka)

GDM nastává, když metabolismus těhotné ženy nedokáže udržet normoglykémii, která reguluje přenos glukózy a živin do plodu

Neléčená GDM zvyšuje riziko:

| Krátkodobé             | Dlouhodobé                                                 |
|------------------------|------------------------------------------------------------|
| Hypertrofie plodu      | Nepřenosných onemocnění matky i dítěte                     |
| Dystokie ramének       | Dětské obezity                                             |
| Porodu císařským řezem | Kardiovaskulární abnormality                               |
| Hypertenze             | Dysfunkce glukózy/inzulínu                                 |
|                        | Alergických/respiračních poruch a neurovývojových následků |

**1 z 6** těhotných žen po celém světě má GDM

GDM může mít za následek epigenetické změny plodu, které jsou nevratné

Nutriční strategie mohou pomoci snížit výskyt GDM u rizikových žen

### Probiotika

*L. rhamnosus* a *B. lactis* Bb12  
▼63 % oproti placebu

### Myoinositol

▼50–60 % u vysoce rizikových žen

\*SGA - plod, jehož váha je nižší než referenční limit ve vztahu ke gestačnímu stáří

Annals of Nutrition and Metabolism Vol 76/S3/20

Annales Nestlé Vol. 78/1/20-21

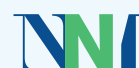

Nestlé  
Nutrition  
Institute

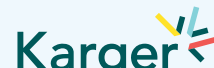

Supplement: Supplementary file 4 [file 1]
