# Supplementary material
Source: publisher figshare collection journal article supplement (https://karger.figshare.com/articles/dataset/_/14054063)

# Ernährung des Fötus

Im Mutterleib bekommen Babys vom Körper ihrer Mutter alles, was sie brauchen. Was passiert, wenn ein Problem bei der Ernährung der Mutter auftritt?

## Übergewicht und Untergewicht

Weltweit sind **9,7 %** der Frauen untergewichtig und **14,9 %** fettleibig.

### Fettleibigkeit bei Müttern steht in Verbindung mit:

- ! Gesteigerter Morbidität der Mütter
- ! Frühgeburten
- ! Kindersterblichkeit
- ! Gesteigertem Risiko von Gestationsdiabetes

### Untergewicht bei Müttern steht in Verbindung mit:

- ! Frühgeburten
- ! Geringem Geburtsgewicht (LBW, Low Birth Weight)
- ! Mortalität unter 5 Jahren
- ! Schlechte geistige und körperliche Entwicklung

Bei untergewichtigen Frauen reduzierten Präparate mit mehreren Mikronährstoffen das Risiko von:

|            |          |
|------------|----------|
| LBW        | ▼12-14 % |
| Frühgeburt | ▼4-8 %   |
| SGA*       | ▼3-8 %   |

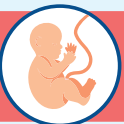

Präkonzeptionelles Gewicht <43 kg oder Gewichtszunahme während der Schwangerschaft <8 kg

=

3x höherem Risiko für SGA\* oder Säugling mit geringem Geburtsgewicht

Die Ernährung zählt nicht nur der Schwangerschaft – ein Fötus kann betroffen sein, wenn eine Frau in der Jugend und vor der Empfängnis nicht die richtigen Nährstoffe erhalten hat.

Bei Frauen im gebärfähigen Alter treten häufig Mangel an Mikronährstoffen und Anämie auf.

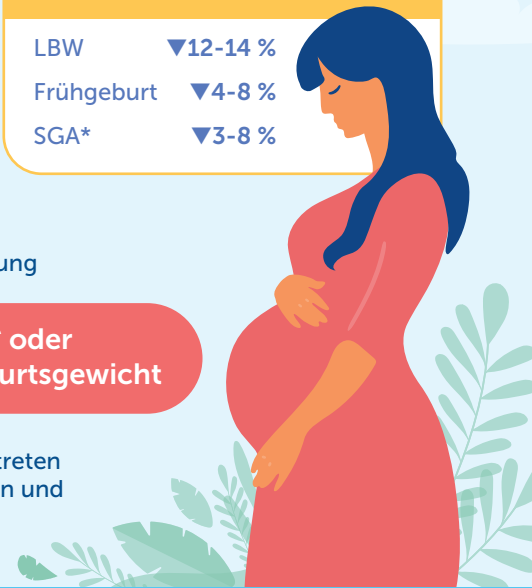

Weltweit sind **29 %** der nicht-schwangeren Frauen und **38 %** der schwangeren Frauen anämisch.

Jährlich kommen 15 Millionen Frühgeborene (<37 Wochen) zur Welt

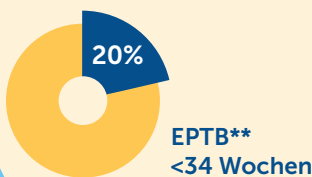

Babys <34 Wochen haben ein erhöhtes Risiko für kurz-/langfristige Gesundheitsprobleme, unter anderem für:

- ! Lunge
- ! Sehvermögen
- ! Darm
- ! Hörvermögen
- ! Immunsystem
- ! Entwicklungsstörungen

## Frühgeburt

2. Haupttodesursache für Kinder unter 5 Jahren

### Ungleichgewicht von Omega-3- und Omega-6-Fettsäuren:

Vorzeitige Zervixreifung

Uteruskontraktionen

Frühgeburt

### Omega-3 LCPUFA

Empfehlung der WHO – in der Schwangerschaft:

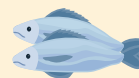

300 mg/Tag

Mediane Einnahme (gebärfähiges Alter):

<100 mg/Tag

Die Korrektur eines niedrigen mütterlichen Omega-3-Spiegels durch Supplementierung kann das EPTB\*\*-Risiko senken.

Omega-3-LCPUFA-Zugabe während der Schwangerschaft reduziert Frühgeburten:

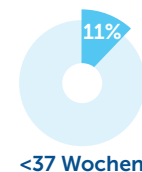

<37 Wochen

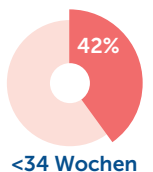

<34 Wochen

## Gestationsdiabetes (GDM)

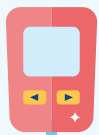

GDM tritt auf, wenn der Stoffwechsel einer schwangeren Frau keine Normalglykämie aufrechterhalten kann, die die Übertragung von Glukose und Nährstoffen auf den Fötus reguliert

Unbehandelter Gestationsdiabetes erhöht Risiken:

| Kurzfristig                    | Langfristig                                                                          |
|--------------------------------|--------------------------------------------------------------------------------------|
| Übermäßiges Wachstum des Fötus | Nicht übertragbare Krankheiten für Mutter und Kind                                   |
| Schulterdystokie               | Fettleibigkeit in der Kindheit                                                       |
| Kaiserschnitt                  | Herz-Kreislauf-Erkrankungen                                                          |
| Hochdruckerkrankungen          | Glukose-/Insulinfunktionsstörungen                                                   |
|                                | Allergische/respiratorische gesundheitliche und neurologische Entwicklungsergebnisse |

**1 von 6** Schwangeren weltweit hat Gestationsdiabetes

Gestationsdiabetes kann zu epigenetischen Veränderungen im Fötus führen, die nicht reversibel sind

Reduzierung des Auftretens von Gestationsdiabetes

### Probiotika

(*L. rhamnosus* und *B. Lactis Bb12*: ▼63 % vs Placebo)

### Myoinositol

(▼50-60 % bei Frauen mit hohem Risiko)

\* klein bezogen auf das Reifealter  
\*\* sehr frühe Frühgeburt

Annals of Nutrition and Metabolism Vol. 76/S3/2020

Annales Nestlé Vol. 78/1/20-21

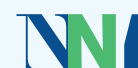

Nestlé Nutrition Institute

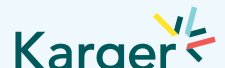

Supplement: Supplementary file 1 [file 1]
