# Supplementary material
Source: publisher figshare collection journal article supplement (https://karger.figshare.com/articles/dataset/_/14054063)
Supplement: Supplementary file 3 [file 1]

# Fetüsün Beslenmesi

Bebekler rahimdeyken ihtiyaç duydukları bütün besinleri annenin bedeninden alır. Peki annenin beslenme düzeninde sorun varsa ne olur?

## Fazla ve düşük kilolu kadınlar

Tüm dünyada kadınların %9,7'si düşük kiloluyken %14,9'u obezdir

### Maternal obezite şunlarla ilişkilidir:

- ! Maternal morbiditede artış
- ! Prematüre doğum
- ! Bebek ölümleri
- ! GDM (gestasyonel diyabet) riskinde artış

### Maternal düşük kilo şunlarla ilişkilidir:

- ! Prematüre doğum
- ! Düşük doğum ağırlığı (DDA)
- ! 5 yaş altında görülen ölümler
- ! Yetersiz zihinsel ve fiziksel gelişim

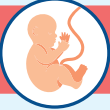

Gebelik öncesi ağırlık <43 kg  
veya gebelikteki kilo artışı <8 kg

= SGA\* veya DDA bebek  
riski 3 kat daha yüksektir

Gebelik esnasında önemli olan sadece beslenme değildir - bir kadın kıvrık çağında ve gebelik öncesinde doğru besinleri almazsa fetüs bundan etkilenebilir.

Mikro besin yetersizlikleri ve anemi doğurganlık çağındaki kadınlar arasında yaygındır.

Düşük kilolu kadınlarda çoklu mikro besin takviyeleri şu riskleri azaltmıştır:

|                 |         |
|-----------------|---------|
| DDA             | ▼%12-14 |
| Prematüre doğum | ▼%4-8   |
| SGA*            | ▼%3-8   |

Tüm dünyada gebe olmayan kadınların %29'unda, gebe kadınların da %38'inde anemi vardır.

Her yıl 15 milyon  
prematüre bebek (<37  
hafta) dünyaya geliyor

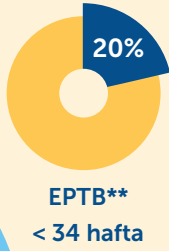

EPTB\*\*  
< 34 hafta

34 haftadan küçük bebeklerde kısa/uzun vadeli sağlık sorunları riskinde artış görülür, örneğin:

- ! Ciğerler
- ! Görmeye
- ! Bağırsaklar
- ! İşitme
- ! Bağışıklık sistemi
- ! Gelişimsel sorunlar

## Prematüre doğum

5 yaşından küçük çocuklarda görülen ölüm nedenlerinde 2'nci sırada

### Omega-3 ve omega-6 yağ asitlerinde görülen dengesizlik:

prematüre servikal olgunlaşma

uterus kontraksiyonları

prematüre doğum

### Omega-3 LCPUFA

DSÖ Tavsiyesi – gebelikte:

Ortalama alım miktarı (doğurganlık dönemi):

300 mg/gün

<100 mg/gün

Besin takviyesiyle annedeki düşük omega-3 seviyelerini düzeltmek, EPTB\*\* riskini azaltabilir.

Gebelik esnasında omega-3 LCPUFA takviyesi prematüre doğumu azaltır:

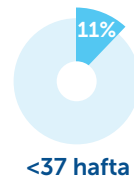

<37 hafta

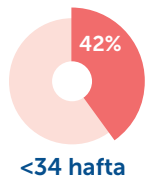

<34 hafta

## Gestasyonel diabetes mellitus (GDM)

GDM, hamile bir kadında glikoz ve besinlerin bebeğe transferini düzenleyen metabolizmanın normoglisemiye devam ettiremediği zaman ortaya çıkar

Tedavi edilmeyen GDM şu risklerde artışa yol açar:

| Kısa vadede            | Uzun vadede                                   |
|------------------------|-----------------------------------------------|
| Fetüsün aşırı büyümesi | Anne ve bebekte bulaşıcı olmayan hastalıklar  |
| Omuz distosisi         | Çocukluk çağı obezitesi                       |
| Sezaryen doğum         | Kardiyovasküler anomaliler                    |
| Hipertansif bozukluk   | Glikoz/insülin disfonksiyonu                  |
|                        | Alerjik/solunumsal ve nörogelişimsel sorunlar |

1/6 dünya çapında gebe kadınlardaki GDM oranı

GDM fetüste epigenetik değişikliklere yol açabilir ve bunlar geri döndürülemez

GDM insidansını azaltır

### Probiyotikler

(L. rhamnosus ve B. Lactis Bb12: ▼%63 - plaseboya kıyasla)

### Myoinositol

(▼%50-60 - yüksek risk grubundaki kadınlarda)

\*SGA (Gebelik Yaşına Göre Küçük)  
\*\* Erken Prematüre Doğum

Annals of Nutrition and Metabolism Vol. 76/S3/20

Annales Nestlé Vol. 78/1/20-21

NMI Nestlé Nutrition Institute

Karger
