# Supplementary material
Source: publisher figshare collection journal article supplement (https://karger.figshare.com/articles/dataset/_/14054063)
Supplement: Supplementary file 5 [file 1]

# La alimentación del feto

En el útero, los bebés obtienen todo lo que necesitan del cuerpo de su madre. ¿Qué sucede cuando hay problemas con su dieta?

## Sobrepeso y peso por debajo de lo normal

En todo el mundo, el **9,7 %** de las mujeres tienen un peso por debajo de lo normal y el **14,9 %** tienen obesidad.

### La obesidad materna se asocia con:

- ! el aumento de la morbilidad materna
- ! partos prematuros
- ! mortalidad infantil
- ! mayor riesgo de padecer diabetes mellitus gestacional

### El peso materno por debajo de lo normal se asocia con:

- ! partos prematuros
- ! bajo peso del neonato
- ! mortalidad antes de los cinco años
- ! problemas en el desarrollo mental y físico

En las mujeres con peso por debajo de lo normal, múltiples suplementos de micronutrientes redujeron el riesgo de:

- bajo peso al nacer ▼12-14 %
- parto prematuro ▼4-8 %
- bebés pequeños para la edad gestacional\* ▼3-8 %

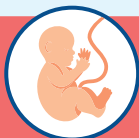

Peso antes de la concepción de <43 kg o aumento de peso durante la gestación de <8 kg.

=

tres veces más riesgo de bebés por debajo de la edad gestacional\* o con bajo peso al nacer.

El feto puede verse afectado si la mujer no recibe los nutrientes adecuados desde antes de la concepción.

Las deficiencias de micronutrientes y la anemia son frecuentes entre las mujeres en edad reproductiva.

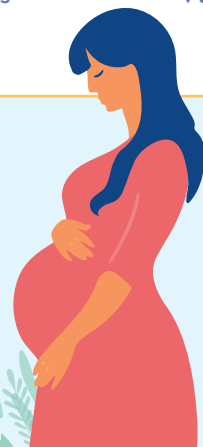

A nivel mundial, el **29 %** de las mujeres no embarazadas y el **38 %** de las mujeres embarazadas tienen anemia.

Cada año nacen 15 millones de bebés prematuros (<37 semanas).

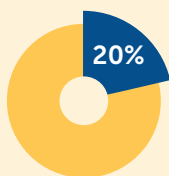

Parto muy prematuro\*\* <34 semanas

Los bebés de <34 semanas de gestación tienen un mayor riesgo de padecer problemas de salud a corto/largo plazo, incluidos:

- ! pulmonares
- ! intestinales
- ! afecciones del sistema inmunitario
- ! de visión
- ! auditivos
- ! dificultades en el desarrollo

## Parto prematuro

Segunda causa principal de muerte en niños antes de los cinco años.

### Desequilibrio de ácidos grasos omega-3 y omega-6:

Maduración cervical prematura

Contracciones uterinas

Parto prematuro

Recomendación de la OMS sobre la ingesta de ácidos grasos poliinsaturados de cadena larga omega-3 (AGPICL ω-3)

durante el embarazo:

300 mg/día

Ingesta media

(en edad de procrear):

<100 mg/día

La corrección de los niveles maternos bajos de omega-3 mediante suplementos puede reducir el riesgo de parto muy prematuro.\*\*

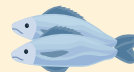

Los suplementos de AGPICL Omega-3 durante el embarazo reducen la posibilidad de parto prematuro:

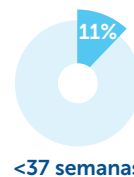

<37 semanas

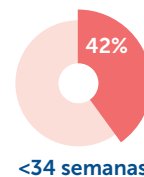

<34 semanas

## Diabetes mellitus gestacional (DMG)

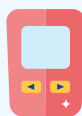

La DMG se produce cuando el metabolismo de una mujer embarazada no puede mantener la normoglucemia, que regula la transferencia de glucosa y nutrientes al feto.

**1 de cada 6** mujeres embarazadas en todo el mundo padece DMG.

Esta puede provocar cambios epigenéticos irreversibles en el feto.

### La DMG aumenta riesgos:

| A corto plazo             | A largo plazo                                                       |
|---------------------------|---------------------------------------------------------------------|
| Sobrecrecimiento fetal    | Enfermedades no transmisibles tanto para la madre como para el niño |
|                           | Obesidad infantil                                                   |
| Nacimiento por cesárea    | Anomalías cardiovasculares                                          |
| Trastornos hipertensivos. | Disfunciones de glucosa/insulina                                    |
|                           | Problemas alérgicos, respiratorios y de neurodesarrollo             |

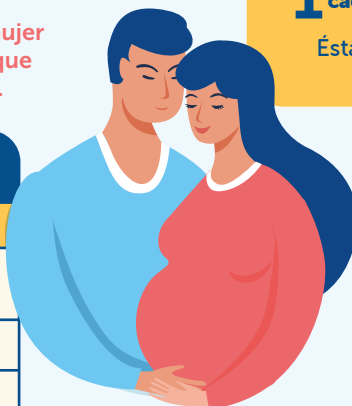

\* Pequeño para la edad gestacional  
\*\* Nacimiento muy prematuro

Annals of Nutrition and Metabolism 76/S3/20

Annals Nestlé Vol. 78/1/20-21

Las estrategias nutricionales pueden ayudar a reducir la incidencia de DMG en mujeres en riesgo

### Probióticos

*L. rhamnosus* y *B. lactis* Bb12:  
▼63 % frente a placebo

### Mioinositol

▼50-60 % en mujeres de alto riesgo

NMI Nestlé Nutrition Institute

Karger
