# Supplementary material
Source: publisher figshare collection journal article supplement (https://karger.figshare.com/articles/dataset/_/14054063)
Supplement: Supplementary file 6 [file 1]

# Nourrir le fœtus

Dans l'utérus, les bébés reçoivent tout ce dont ils ont besoin du corps de leur mère. Que se passe-t-il lorsqu'il y a un problème au niveau de l'alimentation de la mère ?

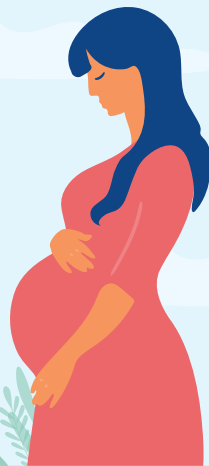

## Surpoids et insuffisance pondérale

De par le monde, **9,7 %** des femmes présentent une insuffisance pondérale et **14,9%** sont obèses

### L'obésité maternelle est associée à :

- ! Augmentation de la morbidité maternelle
- ! Naissance prématurée
- ! Mortalité infantile
- ! Risque accru de diabète gestationnel

### L'insuffisance pondérale maternelle est associée à :

- ! Naissance prématurée
- ! Faible poids à la naissance (FPN)
- ! Mortalité des moins de 5 ans
- ! Mauvais développement mental et physique

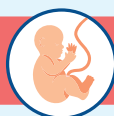

Poids avant la conception <43 kg  
ou prise de poids gestationnelle <8 kg

**= 3 fois plus de risque de PAG\* ou de FPN chez le nourrisson**

Ce n'est pas seulement la nutrition pendant la grossesse qui importe - un fœtus peut être affecté si une femme ne possède pas les nutriments adéquats durant sa petite enfance et avant la conception.

Les carences en micronutriments et l'anémie sont fréquentes chez les femmes en âge de procréer.

**Chez les femmes présentant une insuffisance pondérale, des supplémentations en micronutriments multiples ont réduit le risque de :**

|                      |          |
|----------------------|----------|
| FPN                  | ▼12-14 % |
| Naissance prématurée | ▼4-8 %   |
| PAG*                 | ▼3-8 %   |

À l'échelle mondiale, **29 %** des femmes qui ne sont pas enceintes et **38 %** des femmes enceintes sont anémiques.

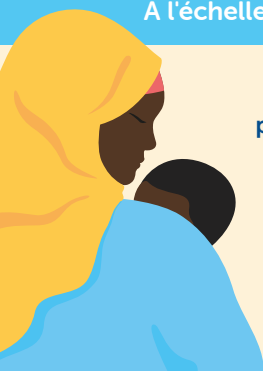

15 millions de bébés prématurés (<37 semaines) naissent chaque année

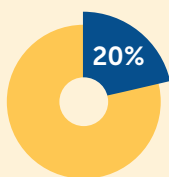

NP\*\* < 34 semaines

**Les bébés de moins de 34 semaines présentent un risque accru de problèmes de santé à court et à long terme, notamment en matière de :**

- ! Poumons
- ! Intestins
- ! Système immunitaire
- ! Vue
- ! Audition
- ! Développement

## Naissance prématurée

2ème cause de décès chez les enfants de moins de 5 ans

### Déséquilibre du rapport acides gras omega 3 / omega 6 :

maturation cervicale prématurée

contractions utérines

naissance prématurée

### Apports en omega-3 AGPICL

Recommandations de l'OMS – grossesse :

Apport médian (en âge de procréer) :

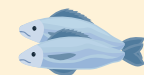

300 mg/jour

< 100 mg/jour

La correction des faibles teneurs maternelles d'oméga-3 par le biais d'une supplémentation peut réduire le risque de tuberculose extrapulmonaire.\*\*

**La supplémentation en oméga-3 LCPUFA pendant la grossesse réduit les risques de naissance prématurée :**

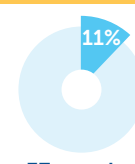

<37 semaines

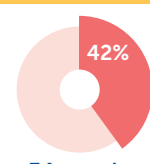

<34 semaines

## Diabète gestationnel

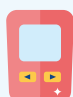

Le diabète gestationnel se produit lorsque le métabolisme d'une femme enceinte ne peut pas maintenir glycémie normale, qui régule le transfert de glucose et de nutriments au fœtus

**Le diabète gestationnel non traité augmente les risques :**

| À court terme        | À long terme                                                                               |
|----------------------|--------------------------------------------------------------------------------------------|
| Macrosomie fœtale    | Maladies non transmissibles de la mère et de l'enfant                                      |
| Dystocie de l'épaule | Obésité infantile                                                                          |
| Césarienne           | Anomalies cardiovasculaires                                                                |
| Trouble hypertensif  | Dysfonctionnement glucose/insuline                                                         |
|                      | Conséquences en matière d'allergie, de santé respiratoire et de développement neurologique |

**1 sur 6** des femmes enceintes dans le monde souffre de diabète gestationnel

Le diabète gestationnel peut entraîner des modifications épigénétiques irréversibles pour le fœtus

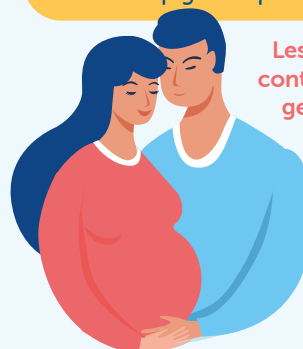

Les stratégies nutritionnelles pourraient contribuer à réduire l'incidence du diabète gestationnel chez les femmes à risque

### Probiotiques

L. rhamnosus et B. lactis Bb12:  
▼63 % vs placebo

### Myoinositol

▼50 à 60 % chez les femmes à haut risque

Annals of Nutrition and Metabolism 76/S3/20  
Annales Nestlé  
Vol. 78/1/20-21

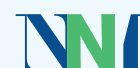

Nestlé  
Nutrition  
Institute

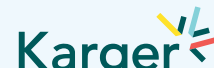

\* Petit pour l'âge gestationnel \*\* Naissance prématurée
