# Supplementary material
Source: publisher figshare collection journal article supplement (https://karger.figshare.com/articles/dataset/_/14054063)

# 哺育胎儿

在子宫里，婴儿从母体得到所需的一切。  
当母亲的饮食有问题时会发生什么？

## 体重超重和体重不足

在全世界范围内，9.7%的妇女体重不足，14.9%则过度肥胖

产妇肥胖可能造成以下后果：

- ！孕产妇患病风险增加
- ！早产
- ！婴儿死亡
- ！GDM风险增加

产妇体重不足可能造成以下后果：

- ！早产
- ！低出生体重 (LBW)
- ！5岁以下儿童死亡
- ！身心发育不良

在体重不足的孕妇中，多微量营养素补充剂可降低以下风险：

|      |         |
|------|---------|
| LBW  | ▼12-14% |
| 早产   | ▼4-8%   |
| SGA* | ▼3-8%   |

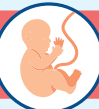

受孕前体重<43公斤  
或孕期体重增加<8公斤 = 产下SGA\*或LBW婴儿的风险高3倍

重要的不仅仅是孕期的营养——如果孕妇在少女时期和受孕前没有适当的营养，胎儿也可能会受到影响。

微量营养素缺乏和贫血在育龄妇女中十分常见。

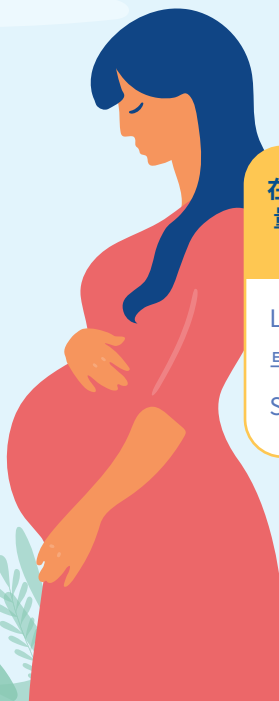

全球范围内，有29%的非孕妇及38%的孕妇患有贫血。

每年有1500万名早产婴儿(<37周)出生

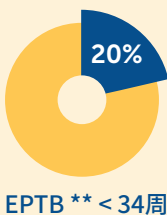

小于34周的婴儿出现短期/长期健康问题的风险更高，其中包括：

- ！肺部
- ！免疫系统
- ！听力
- ！肠道
- ！视力
- ！发育困难

## 早产

5岁以下儿童死亡的第二大原因

ω-3和ω-6脂肪酸摄取不平衡：

宫颈早熟

宫缩

早产

ω-3长链多不饱和脂肪酸 (LCPUFA)

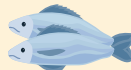

WHO推荐-妊娠：

300毫克/天

中位摄入量(生育年龄)：

<100毫克/天

通过补充来纠正低母体ω-3水平可降低超早产 (EPTB) 的风险。\*\*

妊娠期  
补充ω-3 LCPUFA可减少早产：

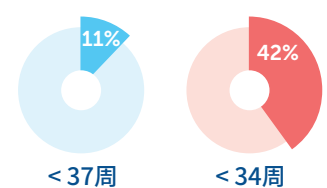

## 妊娠期糖尿病

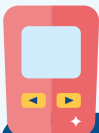

当孕妇的新陈代谢不能维持正常血糖水平时，就会发生妊娠期糖尿病 (GDM)，而正常血糖水平调节着葡萄糖和营养物质向胎儿的转移

未经治疗的GDM增加了以下风险：

| 短期       | 长期               |
|----------|------------------|
| 胎儿过度生长   | 母婴非传染性疾病         |
| 肩难产      | 儿童肥胖             |
| 剖宫产      | 心血管异常            |
| 妊娠期高血压疾病 | 葡萄糖/胰岛素功能障碍      |
|          | 过敏/呼吸系统健康和神经发育结局 |

1/6 的全球孕妇患有GDM

GDM可能导致胎儿不可逆的表观遗传学变化

营养策略或有助于降低高危女性GDM的发病率

益生菌

鼠李糖乳杆菌和动物双歧杆菌Bb12：  
对比安慰剂▼63%

肌醇

高危女性中▼50-60%

\*小于胎龄\*\*早产

Annals of Nutrition and Metabolism Vol. 76/S3/20

Annales Nestlé Vol. 78/1/20-21

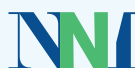

Nestlé  
Nutrition  
Institute

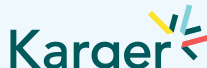

Supplement: Supplementary file 7 [file 1]
