# Supplementary material
Source: publisher figshare collection journal article supplement (https://karger.figshare.com/articles/dataset/_/14054063)
Supplement: Supplementary file 9 [file 1]

# Alimentando o feto

No útero, os bebês obtêm tudo o que precisam do corpo de sua mãe. O que acontece quando há um problema com a dieta da mãe?

## Sobrepeso e baixo peso

Em todo o mundo, **9,7%** das mulheres estão abaixo do peso e **14,9%** são obesas

**A obesidade materna está associada a:**

- ! Aumento da morbidez materna
- ! Parto prematuro
- ! Mortalidade infantil
- ! Maior risco de diabetes mellitus gestacional (DMG)

**O baixo peso materno está associado a:**

- ! Parto prematuro
- ! Baixo peso ao nascer (BPN)
- ! Mortalidade de menores de 5 anos
- ! Desenvolvimento mental e físico prejudicados

**Nas mulheres com baixo peso, a suplementação com multivitamínicos reduz o risco de:**

|                      |         |
|----------------------|---------|
| Baixo peso ao nascer | ▼12-14% |
| Parto prematuro      | ▼4-8%   |
| PIG*                 | ▼3-8%   |

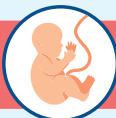

Peso pré-concepção <43kg ou ganho de peso gestacional <8kg

= risco 3x maior de lactente PIG ou com BPN

Não é apenas a nutrição durante a gravidez que importa - um feto pode ser afetado se uma mulher não recebeu os nutrientes certos na adolescência e no período pré-concepção.

Deficiências de micronutrientes e anemia são comuns em mulheres em idade reprodutiva.

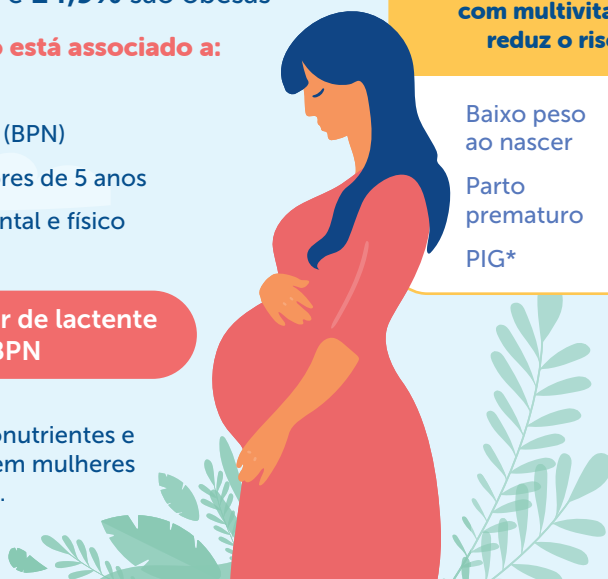

Globalmente, **29%** das mulheres não grávidas e **38%** das mulheres grávidas são anêmicas.

15 milhões de lactentes prematuros (<37 semanas) nascem anualmente

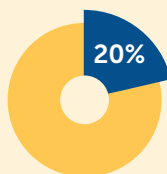

PP\*\* < 34 semanas

**Bebês < 34 semanas têm maior risco de problemas de saúde de curto/longo prazo, incluindo:**

- ! Pulmões
- ! Intestino
- ! Sistema imunológico
- ! Visão
- ! Audição
- ! Dificuldades de desenvolvimento

## Parto prematuro

2ª principal causa de morte em crianças menores de 5 anos

**Desequilíbrio de ácidos graxos ômega-3 e ômega-6:**

Amadurecimento cervical prematuro

Contrações uterinas

Parto prematuro

**Ácido graxo poli-insaturado de cadeia longa (AGPI-CL) ômega 3**

Recomendação da OMS – gravidez:

300 mg/dia

Ingestão média (idade fértil):

<100 mg/dia

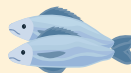

A correção dos baixos níveis maternos de ômega-3 através da suplementação pode reduzir o risco de PP.\*\*

**A suplementação com AGPI-CL ômega-3 durante a gravidez reduz o risco de parto prematuro:**

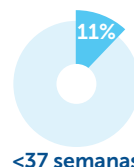

<37 semanas

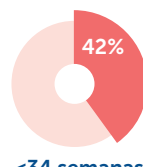

<34 semanas

## Diabetes mellitus gestacional (DMG)

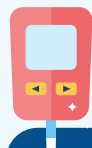

O DMG ocorre quando o metabolismo de uma gestante não consegue manter os níveis normais de glicemia, que regula a transferência de glicose e nutrientes para o feto

**O DMG não tratado aumenta os riscos:**

| No curto prazo              | No longo prazo                                                        |
|-----------------------------|-----------------------------------------------------------------------|
| Crescimento fetal excessivo | Doenças não transmissíveis para a mãe e o filho                       |
| Distócia de ombros          | Obesidade infantil                                                    |
| Cesariana                   | Alterações cardiovasculares                                           |
| Transtorno hipertensivo     | Disfunção de glicose/insulina                                         |
|                             | Impactos na saúde alérgica/respiratória e desenvolvimento neurológico |

**1 em 6** mulheres grávidas em todo o mundo tem DMG

DMG pode resultar em alterações epigenéticas irreversíveis no feto

Estratégias nutricionais podem reduzir a incidência de DMG em mulheres de risco

**Probióticos**

*L. rhamnosus* e *B. lactis* Bb12  
▼63% vs placebo

**Mioinositol**

▼50-60% em mulheres de alto risco

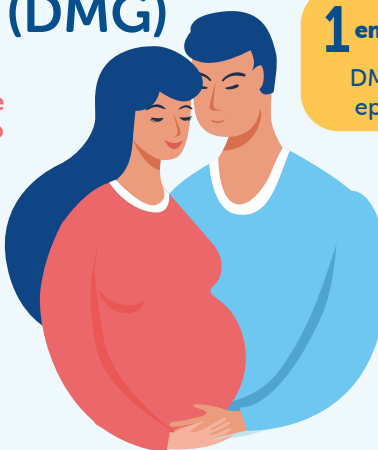

\* Pequeno para a idade gestacional  
\*\*Parto Prematuro

Annals of Nutrition and Metabolism Vol. 76/53/20  
Annales Nestlé Vol. 78/1/20-21

**NNI** Nestlé Nutrition Institute

**Karger**
