# Supplementary material
Source: publisher figshare collection journal article supplement (https://karger.figshare.com/articles/dataset/_/14054063)
Supplement: Supplementary file 10 [file 1]

# Обеспечение плода питательными веществами

В утробе дети получают все необходимые вещества из организма матери. Что происходит при неполноценном рационе матери?

## Избыточная и недостаточная масса тела

у 9,7% женщин в мире недостаточная масса тела, а 14,9% страдают ожирением

### Ожирение у беременных приводит к следующим рискам:

- ! Повышение рисков развития патологий у беременных
- ! Преждевременные роды
- ! Младенческая смертность
- ! Повышенный риск гестационного сахарного диабета

### Недостаточная масса тела у беременных приводит к следующим рискам:

- ! Преждевременные роды
- ! Низкая масса тела при рождении (НМТ)
- ! Смертность в возрасте до 5 лет
- ! Задержка умственного и физического развития

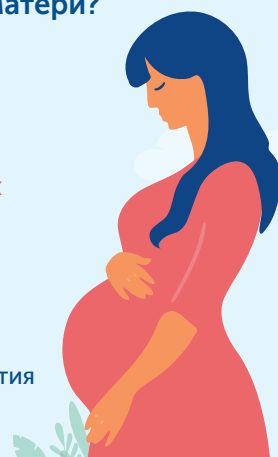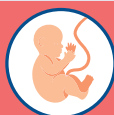

Масса тела до зачатия менее 43 кг или набор веса в период беременности менее 8 кг

= в 3 раза более высокий риск гипотрофии плода\* или низкой массы тела у новорожденного

Значение имеет не только питание во время беременности. На плод может повлиять недостаток необходимых питательных веществ у женщины в подростковом возрасте, а также в период планирования беременности.

От недостатка микроэлементов и анемии страдают многие женщины репродуктивного возраста.

Прием женщинами с недостаточной массой тела комплексных пищевых добавок с микроэлементами снижает риск:

|                                    |         |
|------------------------------------|---------|
| Низкой массы тела у новорожденного | ▼12–14% |
| Преждевременных родов              | ▼4–8%   |
| Гипотрофии плода*                  | ▼3–8%   |

29% небеременных и 38% беременных женщин во всем мире страдают анемией.

## Преждевременные роды

Вторая по распространенности причина смерти детей в возрасте до 5 лет

Ежегодно рождается 15 миллионов недоношенных детей (на сроке менее 37 недель)

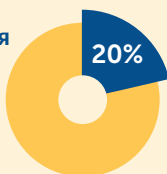

РПР\*\* на сроке до 34 недель

Дети, рожденные на сроках до 34 недель гестации, подвержены повышенному риску развития временных и долгосрочных патологий, включая:

- ! Легкие
- ! Кишечник
- ! Иммунная система
- ! Органы зрения
- ! Органы слуха
- ! Проблемы в развитии

### Дефицит омега-3 и омега-6 жирных кислот:

преждевременное созревание шейки матки

маточные сокращения

преждевременные роды

### Омега-3 ДЦПНЖК

Рекомендации ВОЗ — беременность:

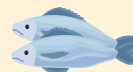

300 мг/сут

Медианное потребление (в детородном возрасте): 100 мг/сут

Коррекция уровня омега-3 кислот у беременных посредством приема пищевых добавок может снизить риск РПР\*\*.

Прием омега-3 ДЦПНЖК во время беременности снижает риск преждевременных родов:

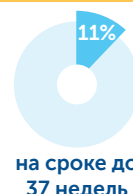

на сроке до 37 недель

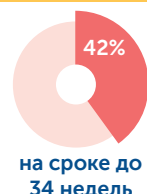

на сроке до 34 недель

## Гестационный сахарный диабет

ГСД возникает, когда обмен веществ беременной женщины не в состоянии поддерживать нормальное количество сахара в крови, при котором регулируется поступление глюкозы и питательных веществ к плоду

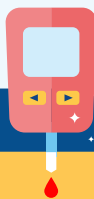

При отсутствии лечения ГСД повышаются риски:

| Недоношенной беременности | Переношенной беременности                                                                    |
|---------------------------|----------------------------------------------------------------------------------------------|
| Гипертрофии плода         | Неинфекционных заболеваний матери и ребенка                                                  |
| Дистонии плечиков         | Детского ожирения                                                                            |
| Кесарева сечения          | Сердечно-сосудистых патологий                                                                |
| Гипертонической болезни   | Нарушения обмена глюкозы/инсулина                                                            |
|                           | Исходов, связанных с аллергическими/респираторными заболеваниями и развитием нервной системы |

1 из 6 беременных женщин в мире страдает ГСД

ГСД может привести к необратимым эпигенетическим изменениям у плода

Правильно организованное питание беременных может помочь снизить риск развития гестационного сахарного

### Пробиотики

L. rhamnosus и B. lactis Bb12:  
▼63% по сравнению с плацебо

### Мио-инозитол

▼50–60% у женщин в группе высокого риска

Annals of Nutrition and Metabolism Vol. 76/53/20

Annales Nestlé Vol. 78/1/20-21

NMI Nestlé Nutrition Institute

Karger

\* Низкая масса для данного гестационного возраста \*\* Ранние преждевременные роды
